# Supplementary material for: Multi‐omics analysis of disulfidptosis regulators and therapeutic potential reveals glycogen synthase 1 as a disulfidptosis triggering target for triple‐negative breast cancer
Source: PubMed Central journal article supplement (PMC10901283; doi:10.1002/mco2.502), 2024-02-28
Supplement: MCO2-5-e502-s001.pdf [file MCO2-5-e502-s001.pdf]

**Multi-omics analysis of disulfidptosis regulators and therapeutic potential reveals glycogen synthase 1 as a disulfidptosis triggering target for triple-negative breast cancer**

Jindong Xie<sup>1, #</sup>, Xinpei Deng<sup>1, #</sup>, Yi Xie<sup>1, #</sup>, Hongbo Zhu<sup>2</sup>, Peng Liu<sup>1</sup>, Wei Deng<sup>1</sup>, Li Ning<sup>1</sup>, Yuhui Tang<sup>1</sup>, Yuying Sun<sup>1</sup>, Hailin Tang<sup>1</sup>, Manbo Cai<sup>2, \*</sup>, Xiaoming Xie<sup>1, \*</sup>, Yutian Zou<sup>1, \*</sup>

<sup>1</sup> State Key Laboratory of Oncology in South China, Guangdong Provincial Clinical Research Center for Cancer, Sun Yat-sen University Cancer Center, Guangzhou, 510060, China.

<sup>2</sup> The First Affiliated Hospital, Hengyang Medical School, University of South China, Hengyang, Hunan, 421001, China.

**\* Correspondence:**

Yutian Zou (zouyt@sysucc.org.cn); Xiaoming Xie (xiexm@sysucc.org.cn):

State Key Laboratory of Oncology in South China, Guangdong Provincial Clinical Research Center for Cancer, Sun Yat-sen University Cancer Center, 651 Dongfeng East Road, Guangzhou, 510060, China.

Manbo Cai (caimanbo@nhfyyy.com):

The First Affiliated Hospital, Hengyang Medical School, University of South China, Hengyang, Hunan, 421001, China.

# These authors contributed equally to this work.

## Supplementary Figure Legends

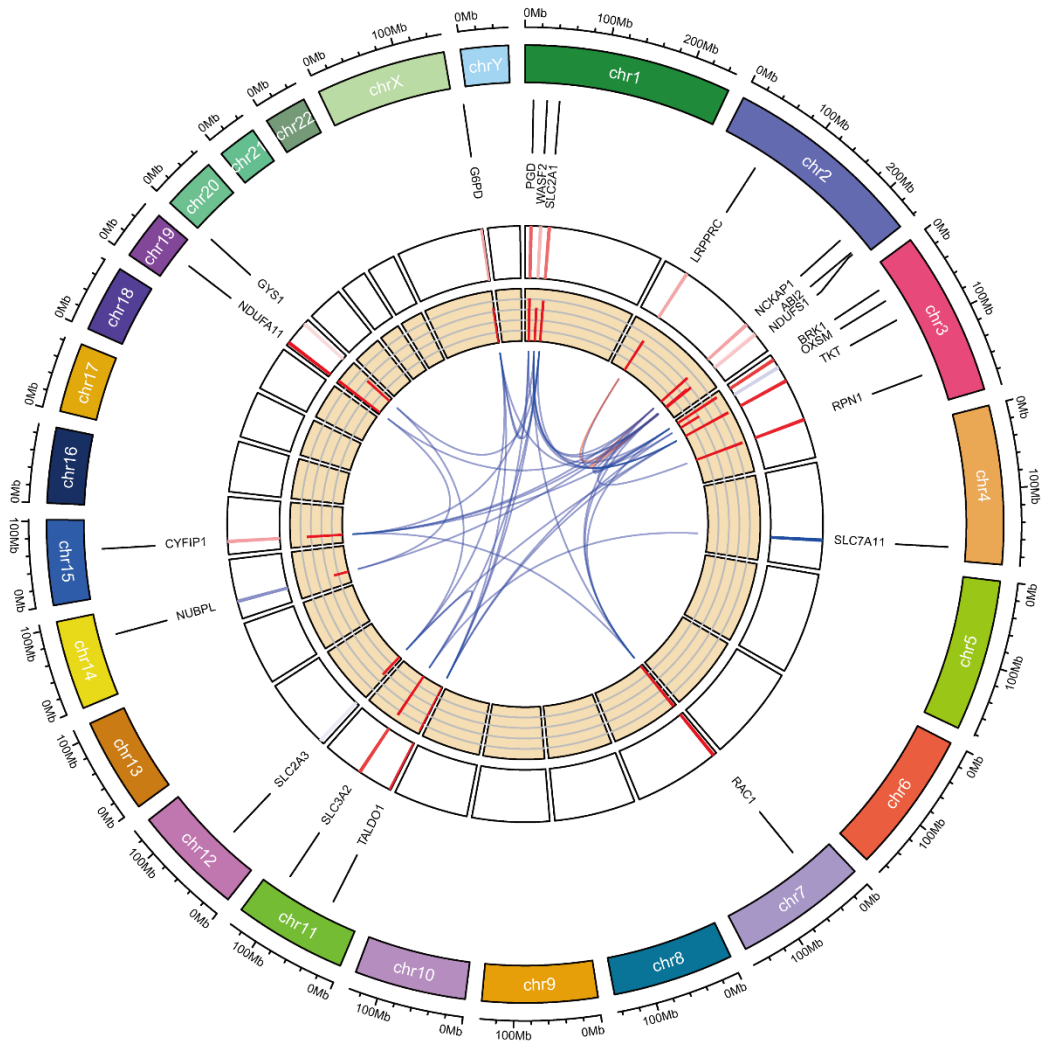

**Supplementary Figure S1. Circos plot showed interaction relationships among ten disulfidptosis regulators.**

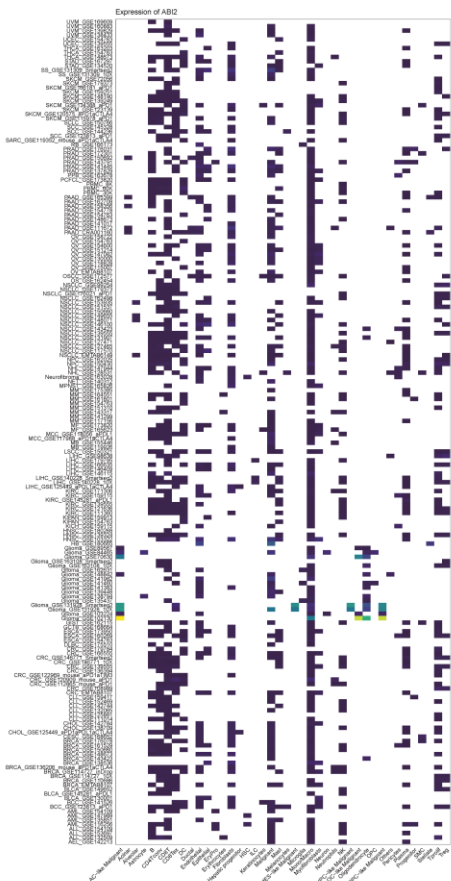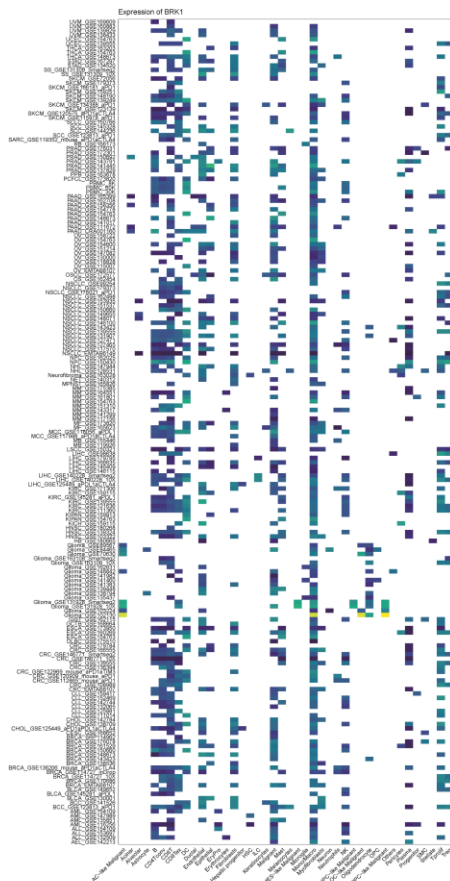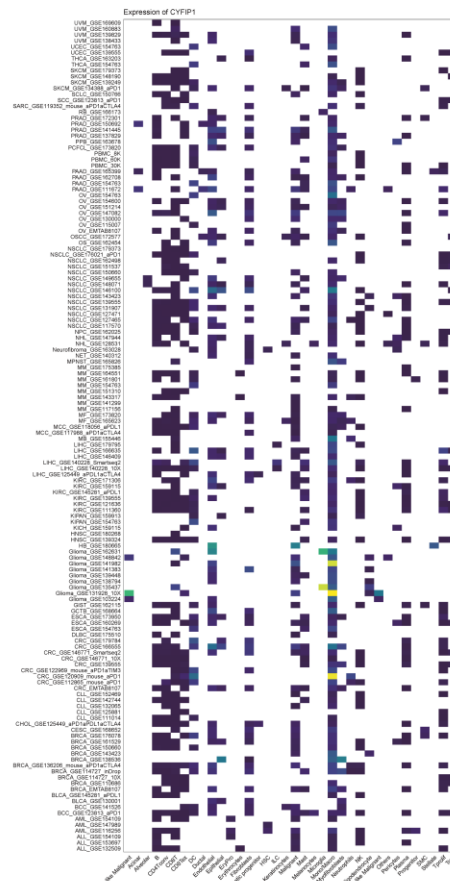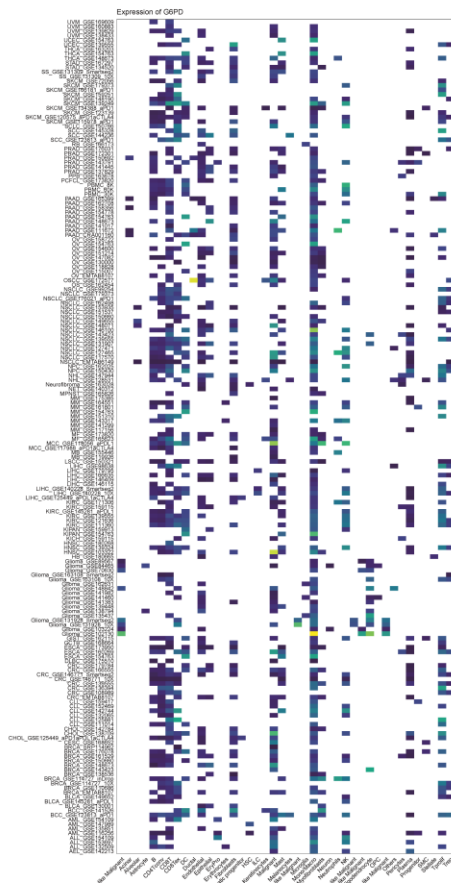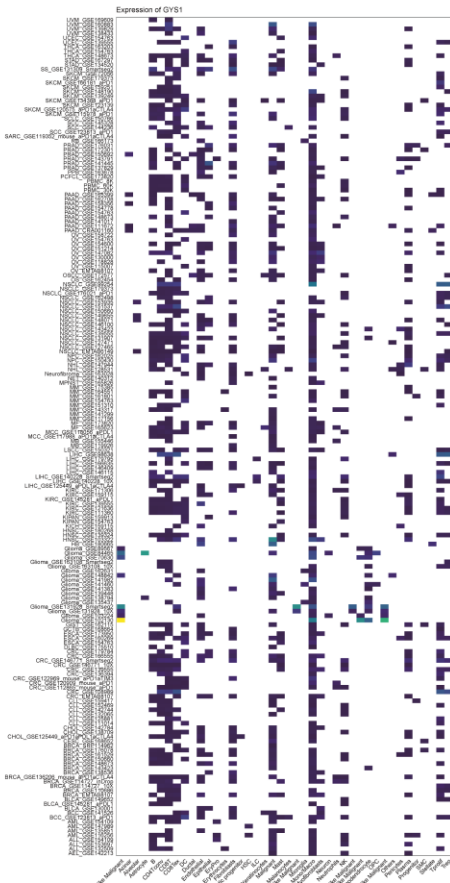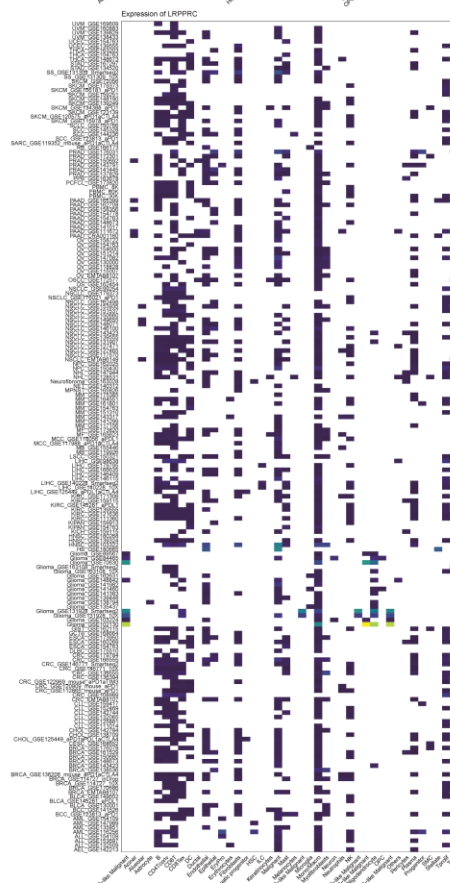







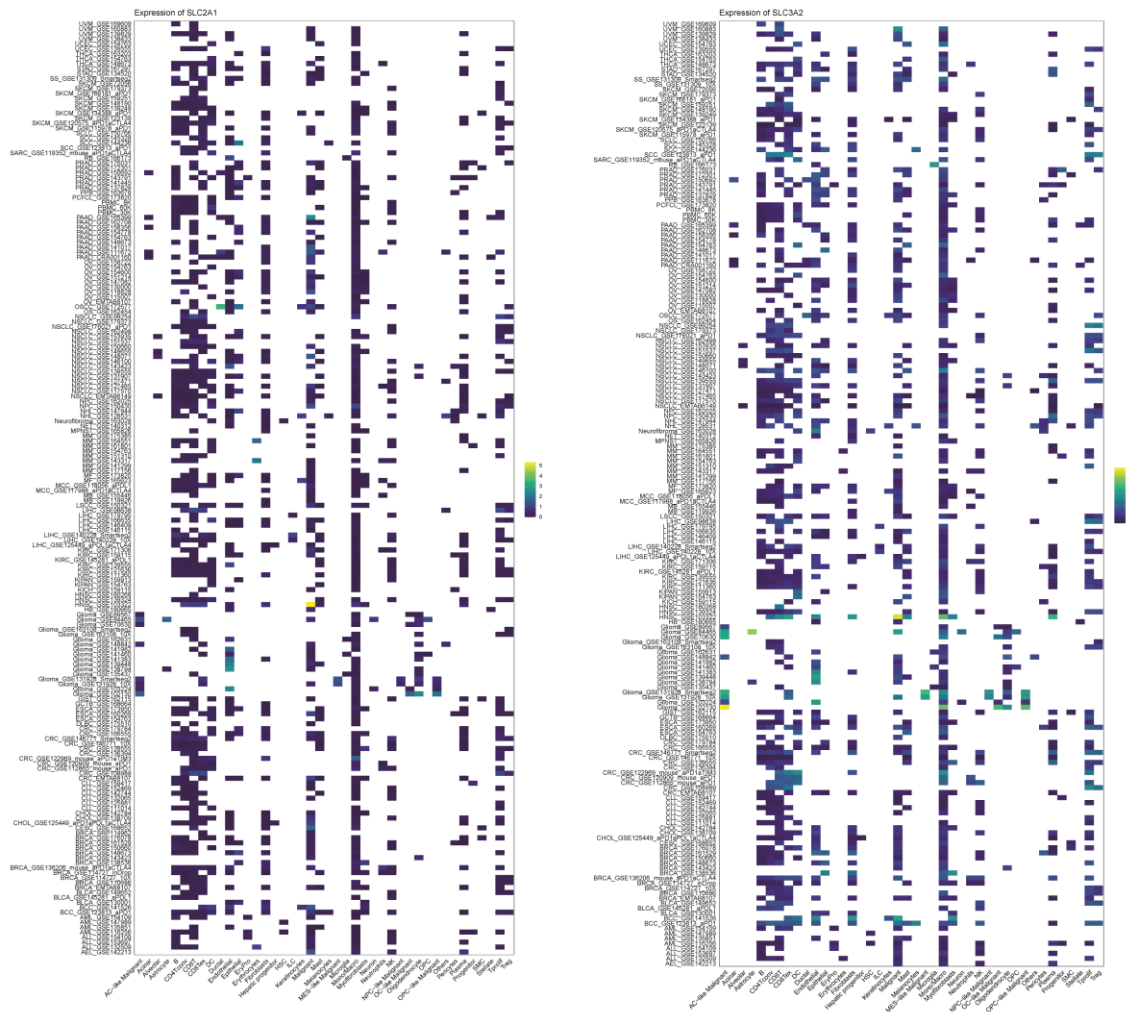

**Supplementary Figure S2. The expression and distribution of each disulfidptosis regulator using TISCH database.**

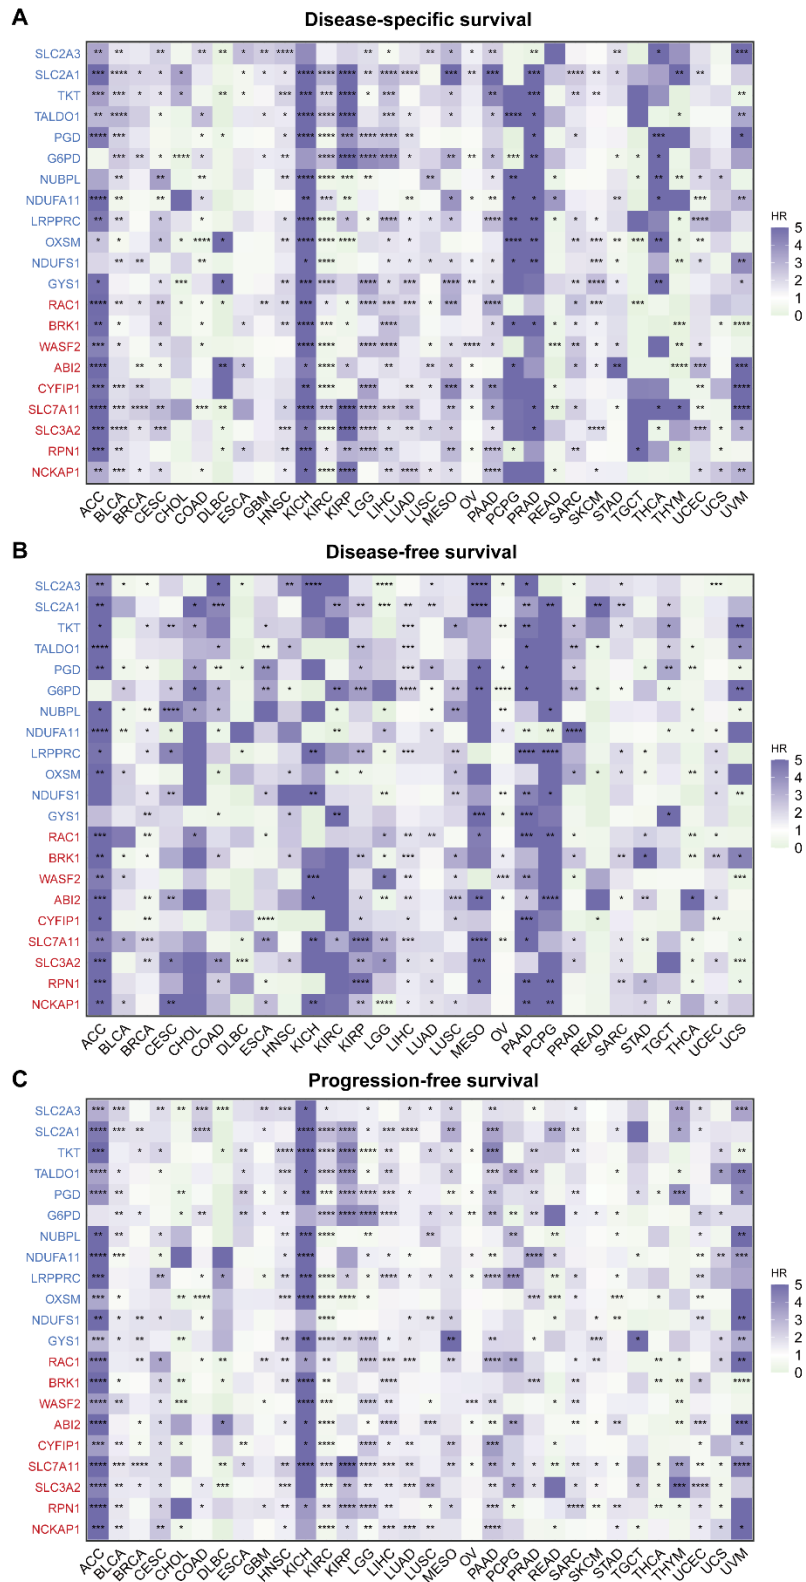

**Supplementary Figure S3. Prognosis patterns of disulfidptosis regulators in the TCGA pan-cancer cohorts. Risky and protective genes are marked in purple and green, respectively (HR, hazard ratio; \*  $p < 0.05$ , \*\*  $p < 0.01$ , \*\*\*  $p < 0.001$ , \*\*\*\*  $p < 0.0001$ ).**

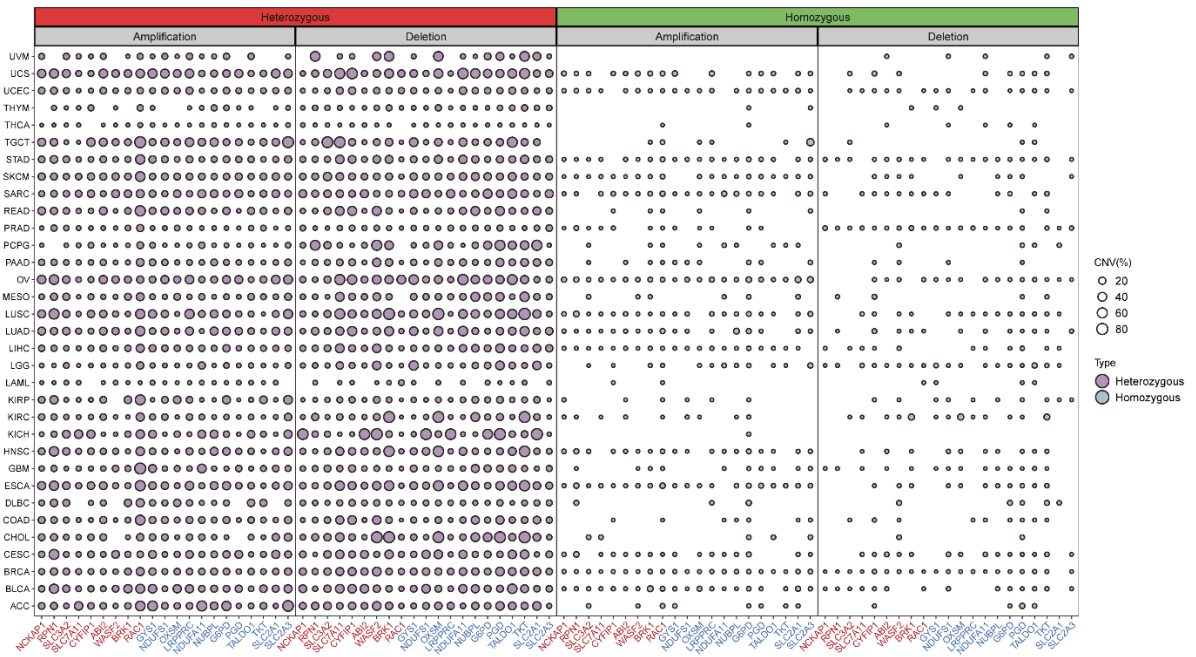

**Supplementary Figure S4. The heterozygous and homozygous copy number variation (CNV) profile of disulfidptosis regulators in each tumor type, including the percentage of amplification and deletion.**



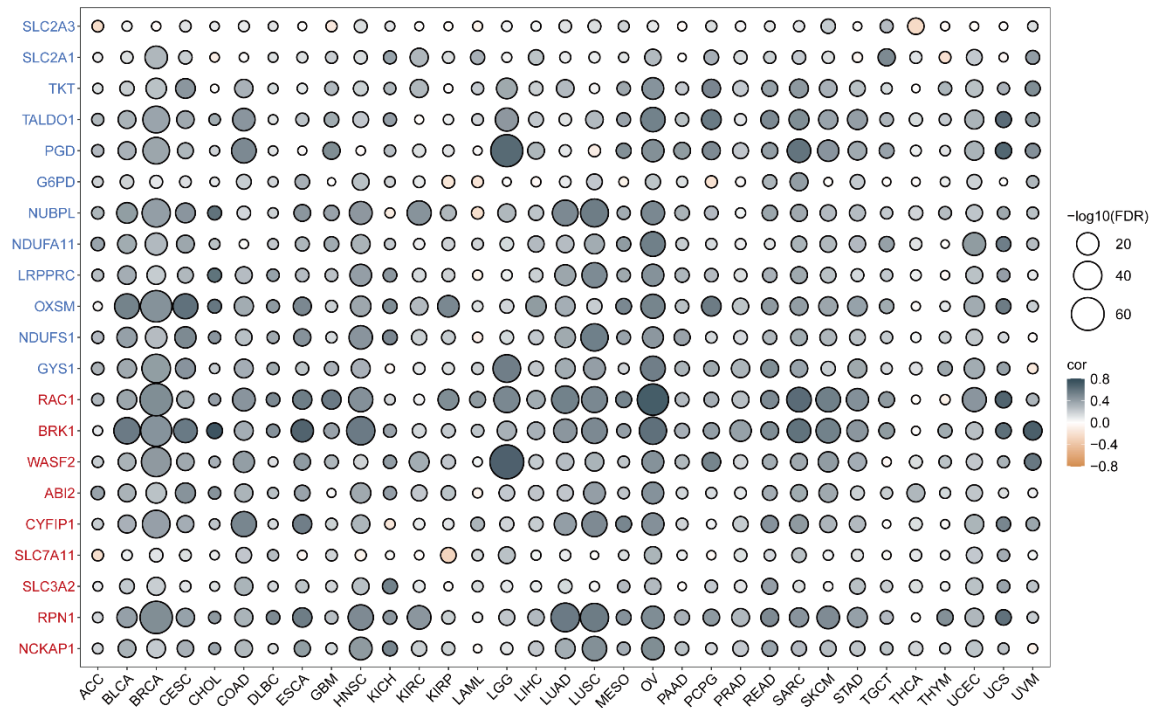

**Supplementary Figure S5. Bubble plot of the correlations between CNV profiles and each disulfidptosis regulator expression in pan-cancer (FDR, false discovery rate).**

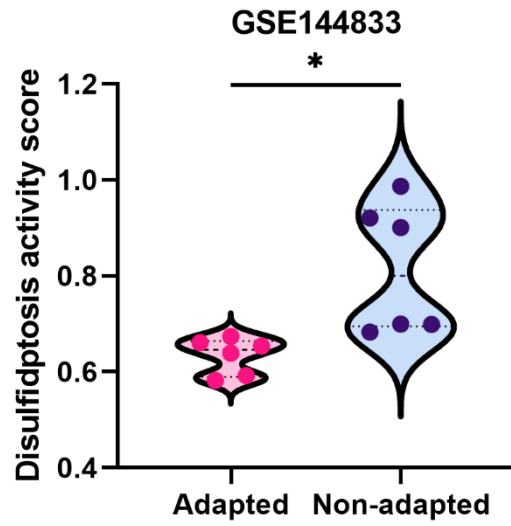

**Supplementary Figure S6. Violin plot showed the different disulfidptosis activity scores between pancreatic cancer cells adapted (n=6) or non-adapted (n=6) to nutrient deprivation.**

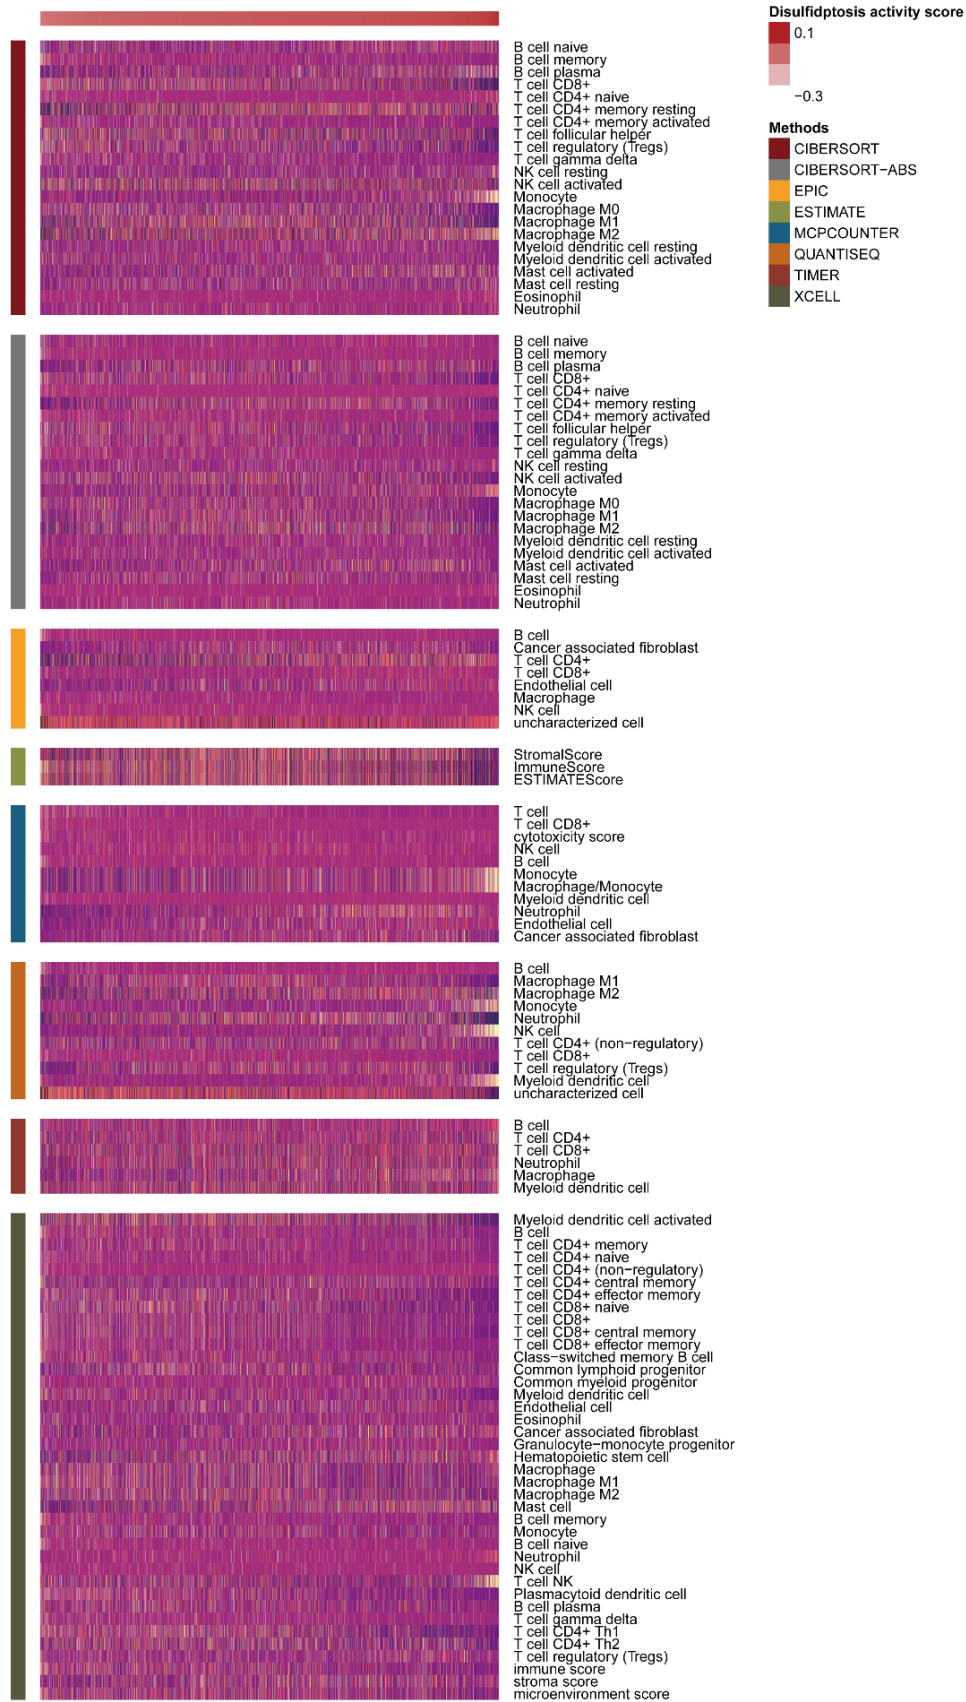

**Supplementary Figure S7. heatmap demonstrating the infiltration levels of multiple cells using different algorithms.**

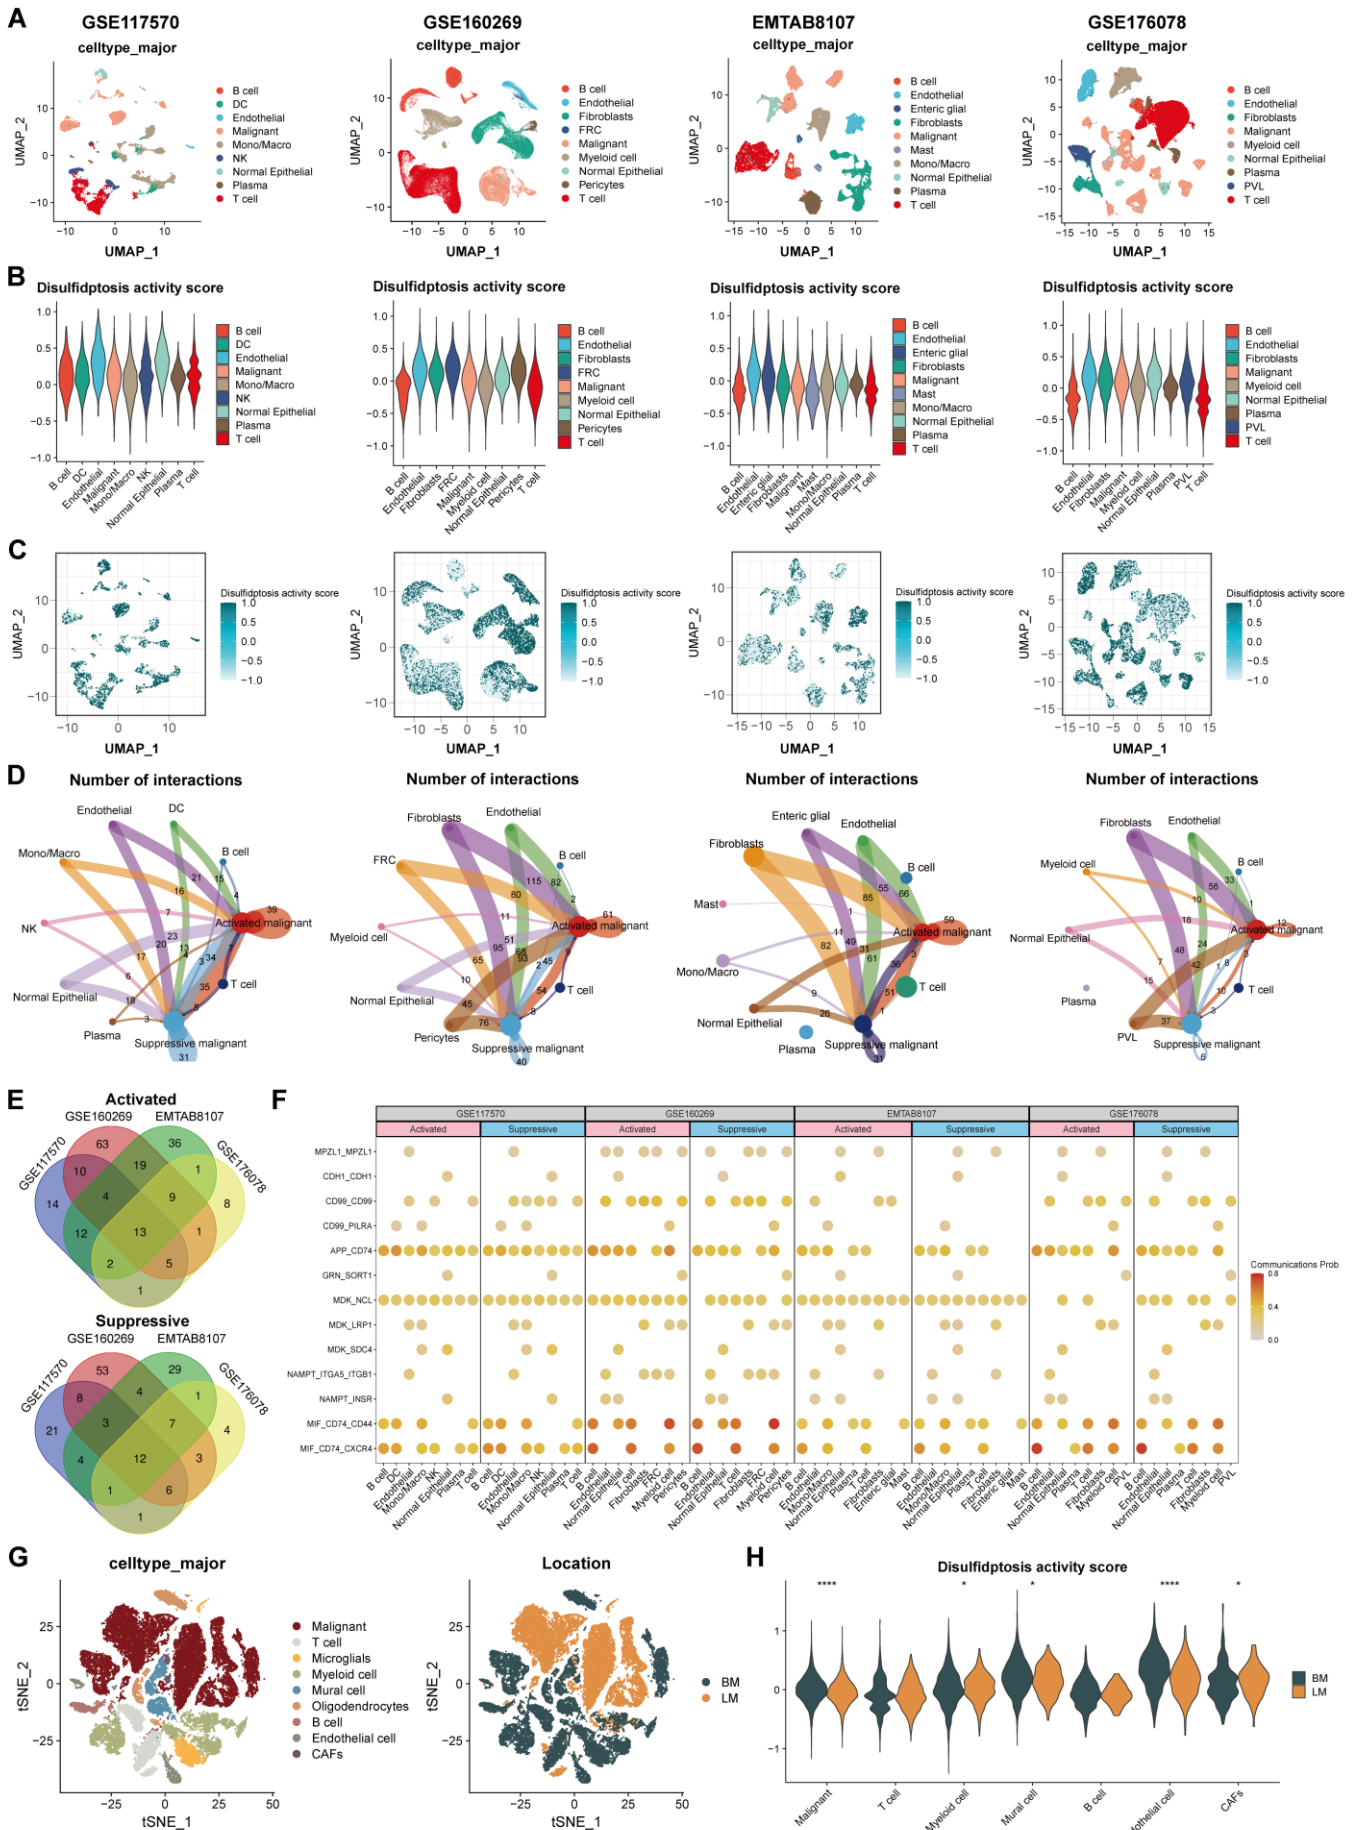

**Supplementary Figure S8. Dissection of disulfidptosis activity score in multiple scRNA-seq cohorts.** (A) UMAP plot visualization of each scRNA-seq cohort. Different colors refer to different cell types. (B) Violin plots of the distribution of the disulfidptosis activity score among different cell types in each scRNA-seq cohort. Different colors refer to different cell types. (C) Feature plots of the expression levels of the disulfidptosis activity score in each scRNA-seq cohort. Green indicates high expression, and white indicates low expression. (D) Cell-cell interactions between the malignant cells (activated and suppressive clusters) and other different cell types in each scRNA-seq cohort. (E) Venn plots of the common ligand-receptor pairs in activated and suppressive groups among scRNA cohorts. (F) Bubble plot of the common ligand-receptor pairs among scRNA cohorts. (G) t-SNE plot of single cells profiled in our previous study colored by major cell type and location (BM, brain metastasis; LM, liver metastasis). (H) Violin plots of the distribution of the disulfidptosis activity score between different locations in our previous study. \*  $p < 0.05$ , \*\*\*\*  $p < 0.0001$ .

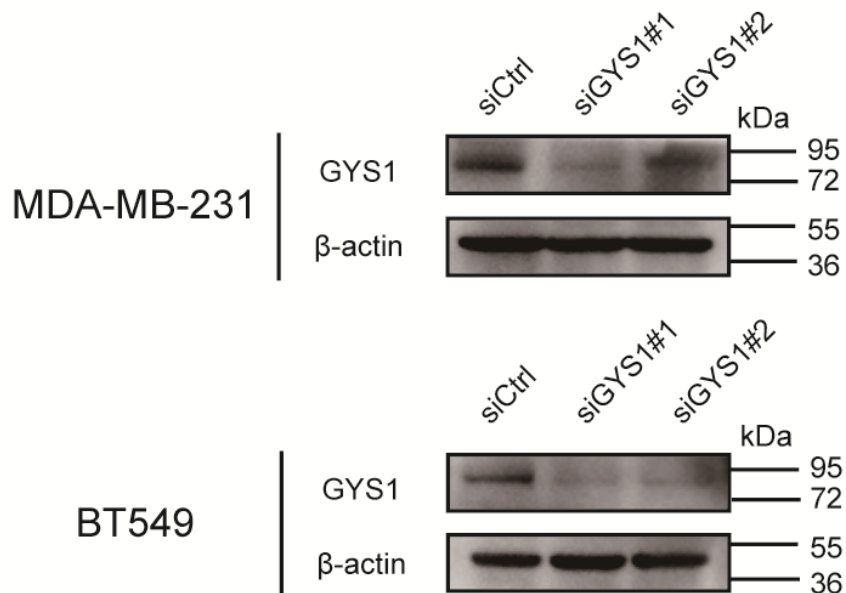

**Supplementary Figure S9. Western blot assays showing the efficacy of siRNAs targeting GYS1 in TNBC cell lines.**



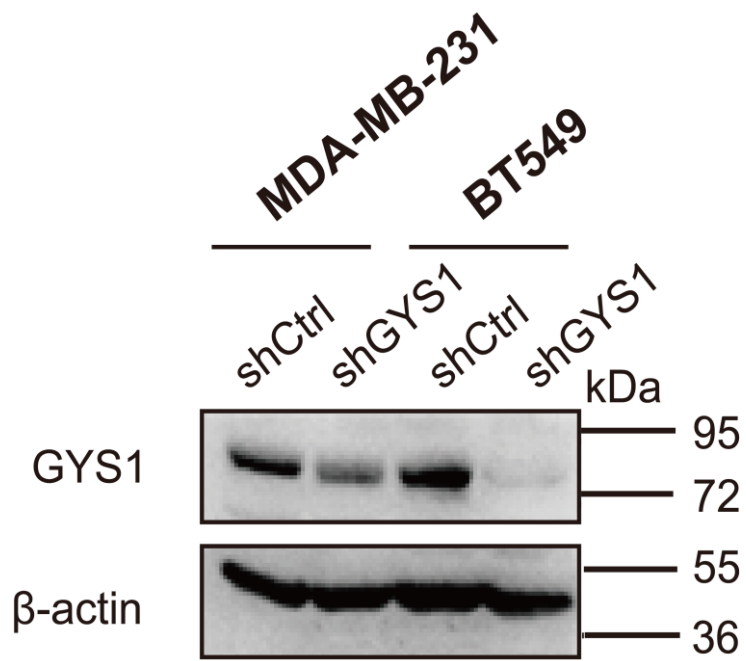

**Supplementary Figure S10. Western blot assays showing the efficacy of shRNA targeting GYS1 in TNBC cell lines.**

**Table S1. Summary of TCGA and GTEx sample sizes of different tumor types in this study.**

Abbreviations: ACC, Adrenocortical Cancer; BLCA, Bladder Cancer; BRCA, Breast Cancer; CESC, Cervical Cancer; CHOL, Bile Duct Cancer; COAD, Colon Adenocarcinoma; DLBC, Large B-cell Lymphoma; ESCA, Esophageal Cancer; GBM, Glioblastoma; HNSC, Head and Neck Squamous Cell Carcinoma; KICH, Kidney Chromophobe; KIRC, Kidney Renal Clear Cell Carcinoma; KIRP, Kidney Renal Papillary Cell Carcinoma; LAML, Acute Myeloid Leukemia; LGG, Lower Grade Glioma; LIHC, Liver Hepatocellular Carcinoma; LUAD, Lung Adenocarcinoma; LUSC, Lung Squamous Cell Carcinoma; MESO, Mesothelioma; OV, Ovarian Cancer; PAAD, Pancreatic Cancer; PCPG, Pheochromocytoma & Paraganglioma; PRAD, Prostate Adenocarcinoma; READ, Rectum Adenocarcinoma; SARC, Sarcoma; SKCM, Skin Cutaneous Melanoma; STAD, Stomach Adenocarcinoma; TGCT, Testicular Cancer; THCA, Thyroid Cancer; THYM, Thymoma; UCEC, Uterine Corpus Endometrial Carcinoma; UCS, Uterine Carcinosarcoma; UVM, Ocular melanomas.

| Tumor type | TCGA (Tumor) | TCGA (Normal) | GTEx (Normal) |
|------------|--------------|---------------|---------------|
| ACC        | 79           | 0             | 258           |
| BLCA       | 406          | 19            | 21            |
| BRCA       | 1101         | 113           | 459           |
| CESC       | 306          | 3             | 19            |
| CHOL       | 35           | 9             | 0             |
| COAD       | 455          | 41            | 779           |
| DLBC       | 48           | 0             | 929           |
| ESCA       | 163          | 11            | 1445          |
| GBM        | 153          | 5             | 2642          |
| HNSC       | 504          | 44            | 0             |
| KICH       | 65           | 25            | 89            |
| KIRC       | 532          | 72            | 89            |
| KIRP       | 290          | 32            | 89            |
| LAML       | 150          | 0             | 0             |

|      |     |    |      |
|------|-----|----|------|
| LGG  | 513 | 0  | 2642 |
| LIHC | 371 | 50 | 226  |
| LUAD | 516 | 59 | 578  |
| LUSC | 501 | 49 | 578  |
| MESO | 87  | 0  | 0    |
| OV   | 376 | 0  | 180  |
| PAAD | 179 | 4  | 328  |
| PCPG | 181 | 3  | 0    |
| PRAD | 498 | 52 | 245  |
| READ | 165 | 10 | 779  |
| SARC | 260 | 2  | 0    |
| SKCM | 471 | 1  | 1809 |
| STAD | 375 | 32 | 359  |
| TGCT | 134 | 0  | 361  |
| THCA | 512 | 59 | 653  |
| THYM | 120 | 2  | 0    |
| UCEC | 545 | 35 | 142  |
| UCS  | 57  | 0  | 142  |
| UVM  | 80  | 0  | 0    |

---

**Table S2. Datasets enrolled in this study.**

| Dataset       | Tumor types | Sample sizes |
|---------------|-------------|--------------|
| TCGA+GTEx     | Pan-cancer  | 23261        |
| GSE62663      | NSCLC       | 8            |
| GSE121378     | BRCA        | 8            |
| GSE183127     | LIHC        | 6            |
| GSE194369     | PAAD        | 10           |
| GSE104462     | LIHC        | 6            |
| GSE32369      | COAD        | 11           |
| GSE206261     | PAAD        | 6            |
| GSE171167     | ESCC        | 8            |
| GSE144833     | PAAD        | 12           |
| CheckMat      | ccRCC       | 181          |
| IMvigor210    | BLCA        | 258          |
| GSE91061      | SKCM        | 28           |
| GSE78220      | SKCM        | 28           |
| GSE58812      | BRCA        | 107          |
| GSE96058      | BRCA        | 143          |
| METABRIC      | BRCA        | 298          |
| GSE21653      | BRCA        | 85           |
| GSE76250      | BRCA        | 66           |
| GSE117570     | NSCLC       | 4            |
| GSE160269     | ESCC        | 60           |
| EMTAB8107     | CRC         | 7            |
| GSE176078     | BRCA        | 9            |
| SYSUCC-Cohort | BRCA        | 6            |
| FUSCC-Cohort  | BRCA        | 66           |
| Zenodo-ST     | BRCA        | 1            |

**Table S3. siRNAs sequence.**

|               |           |                          |
|---------------|-----------|--------------------------|
| Non-targeting | siControl | 5'-UUCUCCGAACGUGUCACGUTT |
| GYS1          | siGYS1#1  | 5'-CCAACGACGCUGUCCUCUUTT |
|               | siGYS1#2  | 5'-CCAUCGAGGCACAGCACUUTT |



**Table S4. shRNAs sequence.**

|               |           |                     |
|---------------|-----------|---------------------|
| Non-targeting | shControl | TTCTCCGAACGTGTCACGT |
| GYS1          | shGYS1    | CCATCGAGGCACAGCACTT |

**Table S5. Primers for qRT-PCR detection.**

|                |         |                        |
|----------------|---------|------------------------|
| GYS1           | Forward | GCGCTCACGTCTTCACTACTG  |
|                | Reverse | TCCAGATGCCCATAAAAATGGC |
| $\beta$ -actin | Forward | CATGTACGTTGCTATCCAGGC  |
|                | Reverse | CTCCTTAATGTCACGCACGAT  |
